# Supplementary material
Source: PubMed Central journal article supplement (PMC419599)
Supplement: nar_32_9_2776__1.pdf [file nar_32_9_2776__1.pdf]

Supplemental Figure 1. A FRAP experiment of a W7-treated HeLa cell expressing Ku70-GFP. The first frame is a prebleach image, and the following frames were collected every 1.7 s beginning 1.4 s following a 2 s photobleach pulse.

Supplemental Figure 2. A FRAP experiment of a HeLa cell expressing Ku70-GFP and with no treatment prior to measurement.

Supplemental Figure 3. A FRAP experiment of a W7-treated HeLa cell expressing GFP.

Supplemental Figure 4. A FRAP experiment of an untreated HeLa cell expressing GFP.
